# Supplementary material for: Efficient detection of carbendazim using an electrochemical sensor for a novel NiFeLDH@HsGY-NH2/MWCNTs heterostructure with lattice-strain
Source: Royal Society of Chemistry journal article supplement (doi:10.1039/d4ay01265h), 2024-01-01
Supplement: d4ay01265h1.pdf [file d4ay01265h1.pdf]

Electronic Supplementary Material (ESI) for Analytical Methods.

This journal is © The Royal Society of Chemistry 2024

## **Electronic Supplementary Information**

**Efficient detection of carbendazim using electrochemical sensor for a novel**

**NiFeLDH@HsGY-NH<sub>2</sub>/MWCNTs heterostructure with lattice-strain**

Na Li,<sup>a,b</sup> Baokun Tang <sup>a,b</sup> and Tao Zhu<sup>a,b\*</sup>

*<sup>a</sup> Key Laboratory of Pharmaceutical Quality Control of Hebei Province, College of Pharmaceutical Sciences, Hebei University, Baoding, 071002, China*

*<sup>b</sup> State Key Laboratory of New Pharmaceutical Preparations and Excipients, Key Laboratory of Medicinal Chemistry and Molecular Diagnosis of Ministry of Education, Institute of Life Science and Green Development, College of Chemistry and Materials Science, Baoding, 071002, China*

*\*Corresponding authors. E-mail addresses: zhutao@tjut.edu.cn (Tao Zhu)*

## **S1. Preparation of the real samples**

2.0 g of *Atractylodes macrocephala* powder was weighed and ultrasounded for 1 h in a round flask containing 50 mL of 70% methanol solution, centrifugation, filtration. Subsequently, the extraction was concentrated to 10 mL. Finally, the solution diluted 100 folds with a phosphate buffer solution (PBS) (0.1M, pH 4.0). Tomatoes and oranges were bought from the local supermarket. These samples were weighed, juiced, filtered and centrifuged. which was diluted 100 times with PBS (0.1 M, pH 4.0). These samples were reserved in a refrigerator at 4 °C for subsequent experiments.

## S2. Supporting Figures and Table

**Scheme S1** Synthesis diagram of HsGY-NH<sub>2</sub>

**Scheme S2** Mechanism of electrochemical oxidation of CBZ.

**Fig. S1** XRD patterns of HsGY, HsGY-NH<sub>2</sub> and MWCNTs.

**Fig. S2** (A) XPS full spectrum of the HsGY and HsGY-NH<sub>2</sub>; the high resolution (B) C 1s; (C) N 1s and (D) S 2p spectra of HsGY-NH<sub>2</sub>.

**Fig. S3** XPS full spectrum of the NiFeLDH@HsGY-NH<sub>2</sub> and NiFeLDH@HsGY-NH<sub>2</sub>/MWCNTs.

**Fig. S4** FT-IR spectra of HsGY (a), HsGY-NH<sub>2</sub> (b).

**Fig. S5** (A-C) BET N<sub>2</sub> adsorption-desorption and (D-F) BJH pore size distribution curves of different materials.

**Table S1.** The linear equations of each modified electrode about  $Q-t^{1/2}$ .

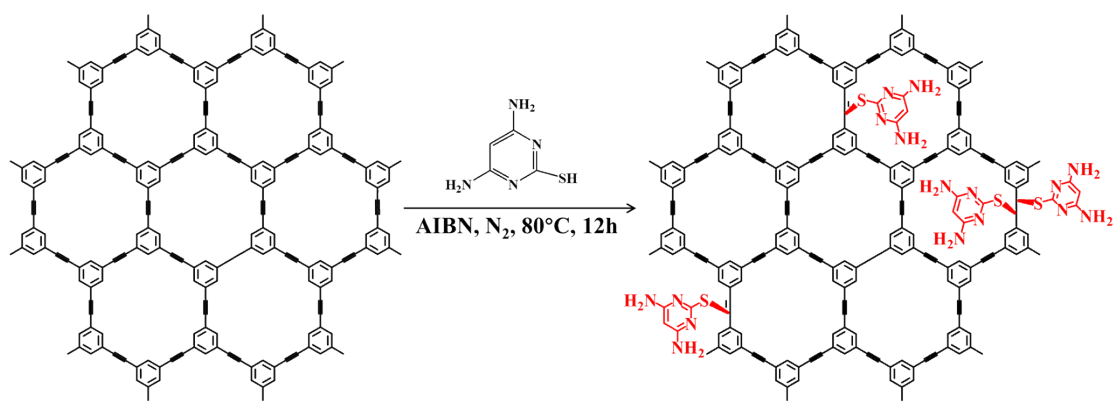

**Scheme S1** Synthesis diagram of HsGY-NH<sub>2</sub>

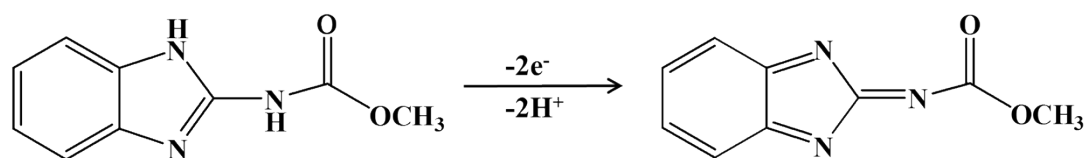

**Scheme S2** Mechanism of electrochemical oxidation of CBZ.

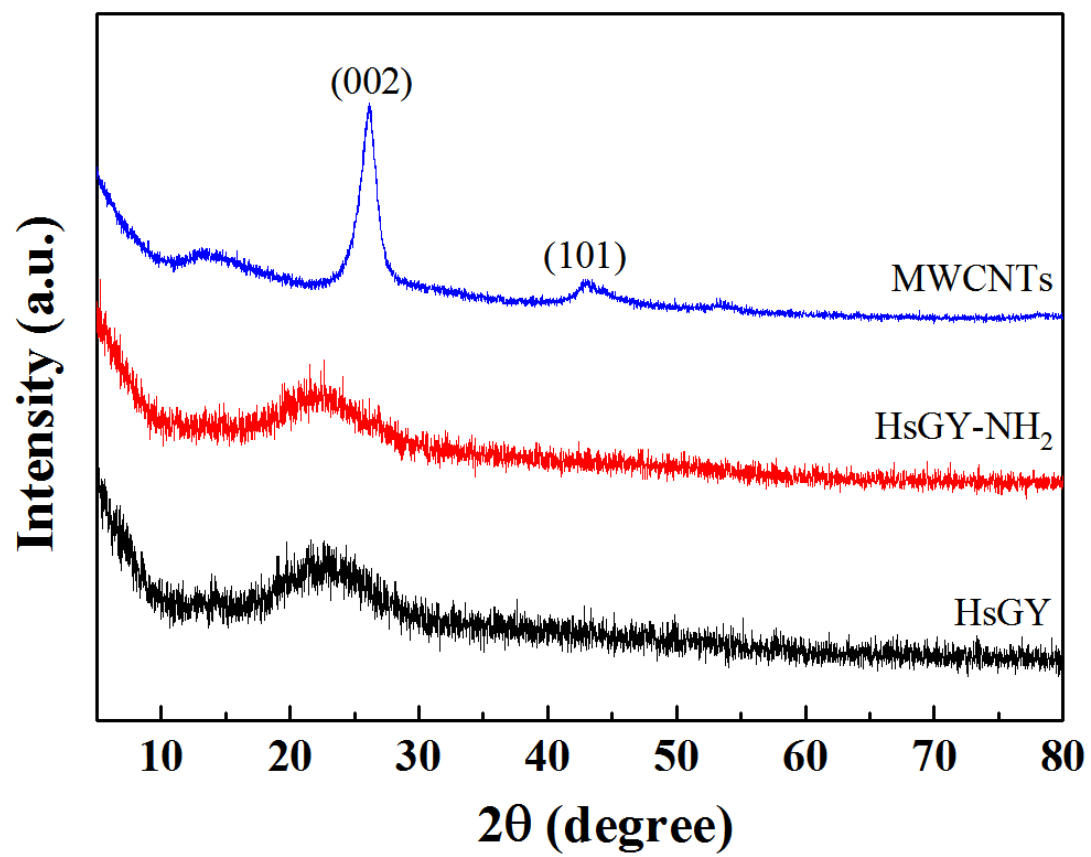

Fig. S1 XRD patterns of HsGY, HsGY-NH<sub>2</sub> and MWCNTs.

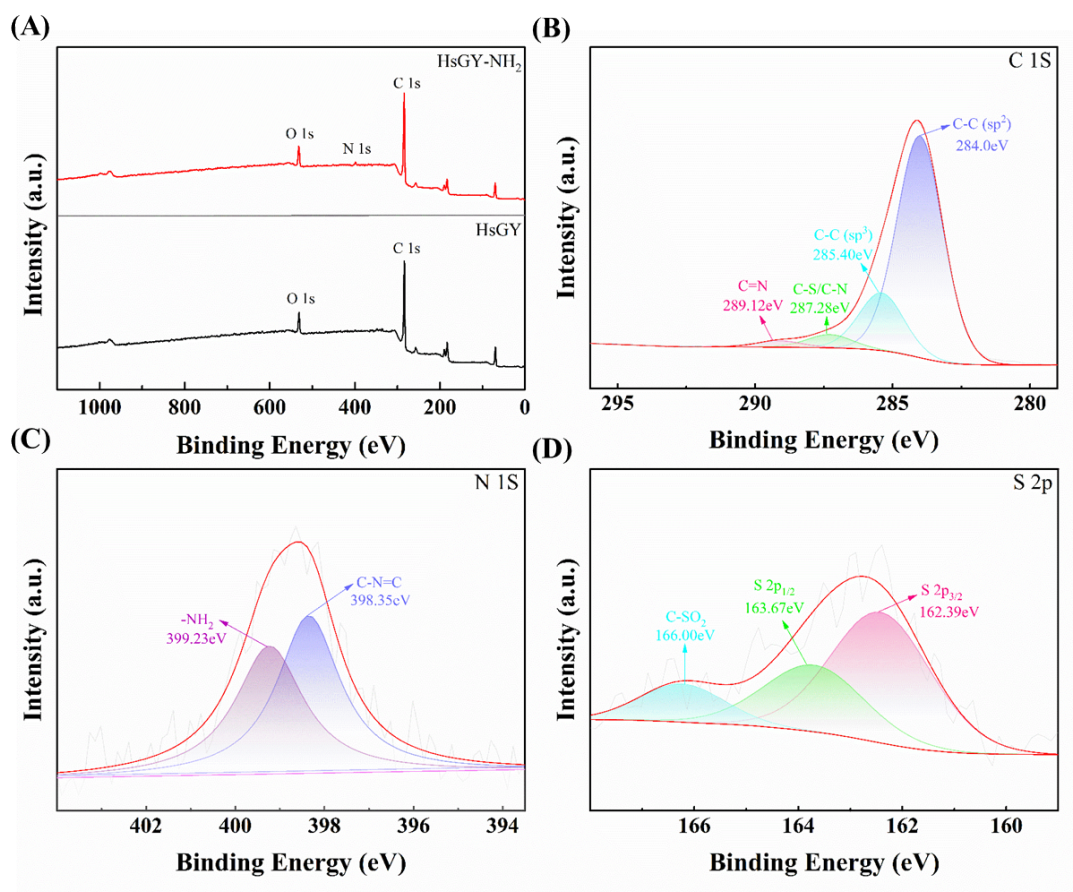

**Fig. S2** (A) XPS full spectrum of the HsGY and HsGY-NH<sub>2</sub>; the high resolution (B) C 1s; (C) N 1s and (D) S 2p spectra of HsGY-NH<sub>2</sub>.

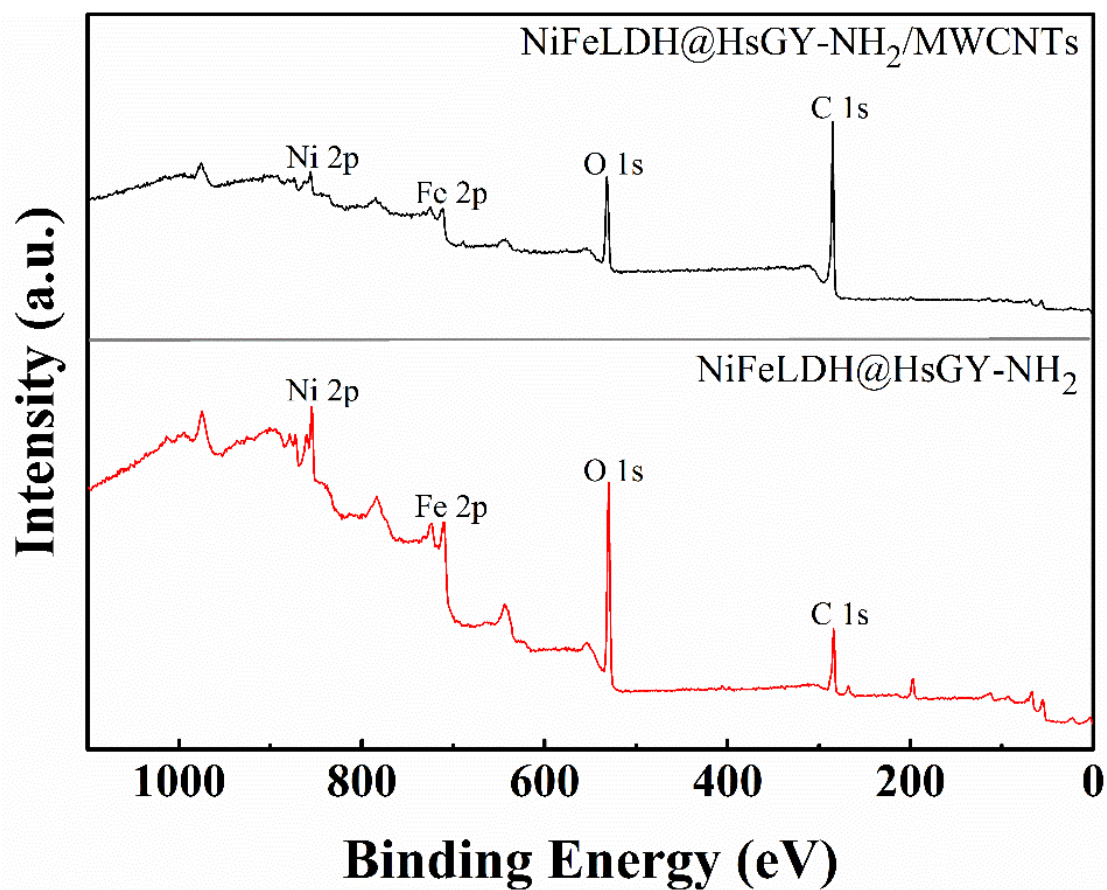

**Fig. S3** XPS full spectrum of the NiFeLDH@HsGY-NH<sub>2</sub> and NiFeLDH@HsGY-NH<sub>2</sub>/MWCNTs.

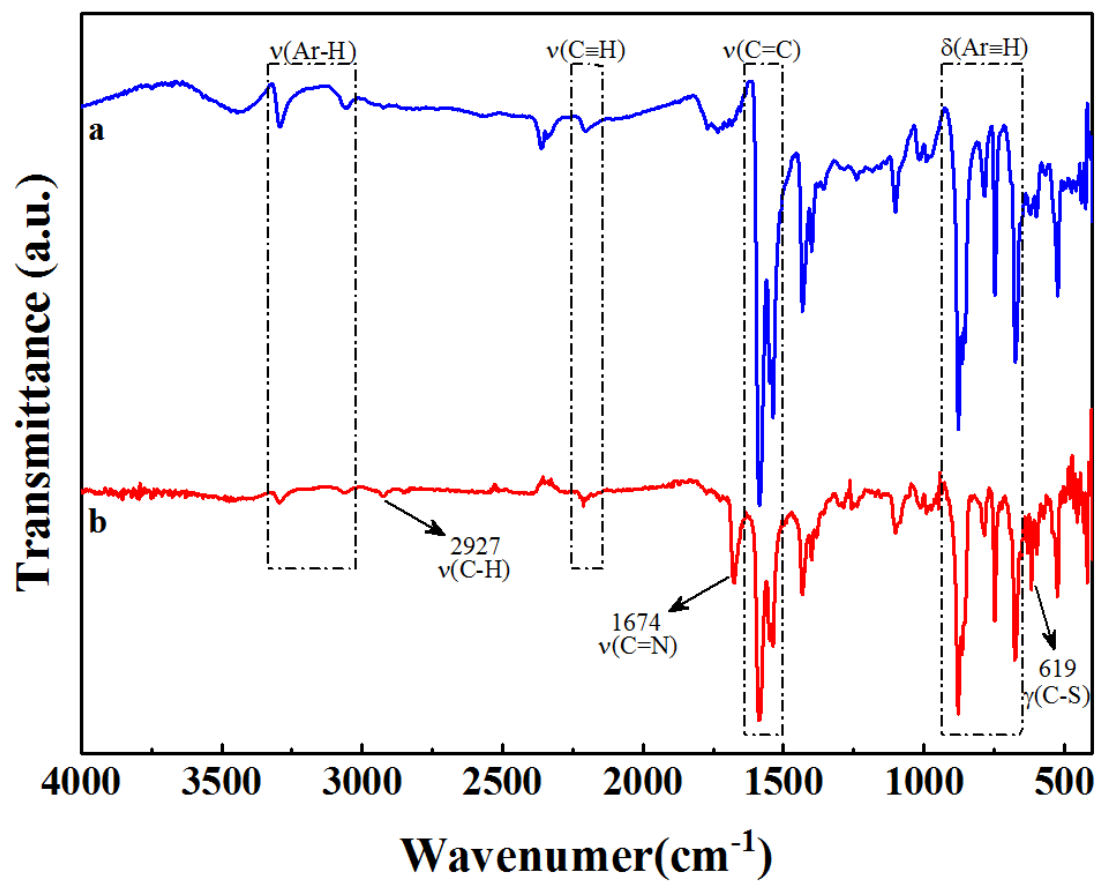

Fig. S4 FT-IR spectra of HsGY (a), HsGY-NH<sub>2</sub> (b).



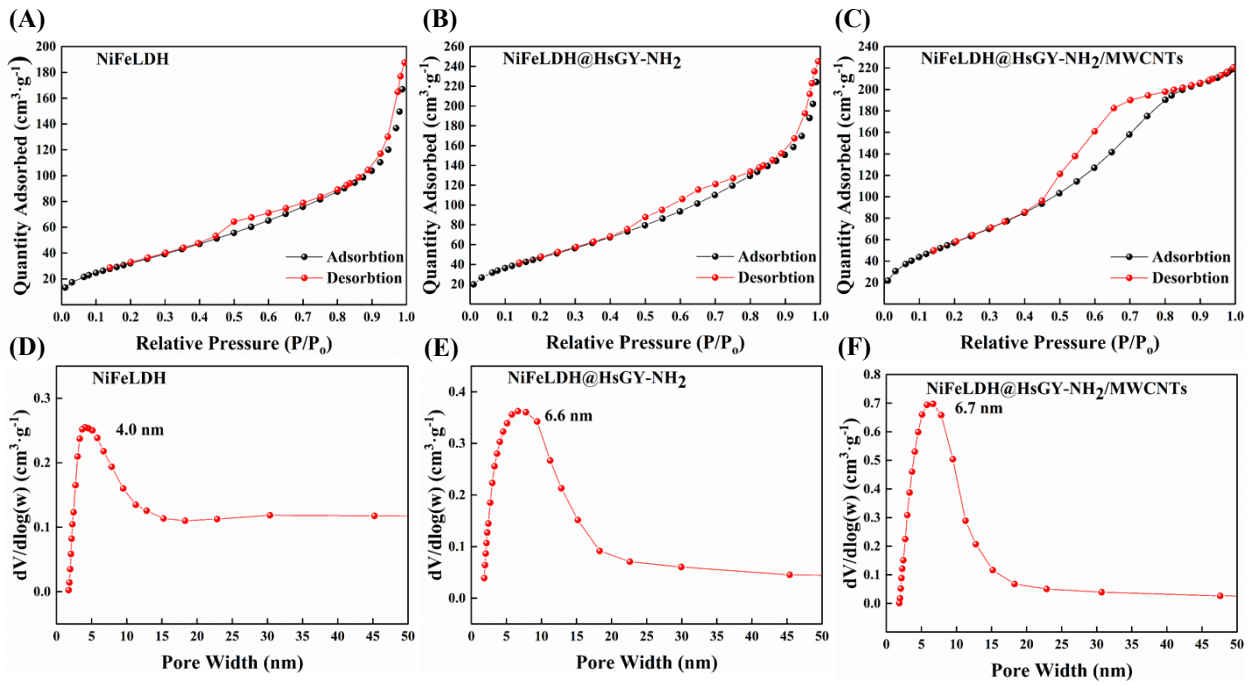

**Fig. S5** (A-C) BET  $N_2$  adsorption-desorption and (D-F) BJH pore size distribution curves of different materials.

**Table S1.** The linear equations of each modified electrode about  $Q-t^{1/2}$ .

| Electrode                                | Linear equation of $Q-t^{1/2}$ |
|------------------------------------------|--------------------------------|
| GCE                                      | $5.700t^{1/2}+1.626$           |
| NiFeLDH/GCE                              | $3.982t^{1/2}+1.209$           |
| NiFeLDH@HsGY/GCE                         | $4.634t^{1/2}+0.818$           |
| NiFeLDH@HsGY-NH <sub>2</sub> /GCE        | $4.752t^{1/2}+1.236$           |
| NiFeLDH@HsGY/MWCNTs/GCE                  | $26.214t^{1/2}+21.817$         |
| NiFeLDH@HsGY-NH <sub>2</sub> /MWCNTs/GCE | $34.603t^{1/2}+23.984$         |

An explanation of the relevant parameters in Anson 's equation:  $n$  represents the number of electron transferred in the electrochemical reaction,  $F$  denotes the Faraday's constant,  $A$  signifies the effective surface area,  $c$  expresses the molality concentration of the electroactive molecules,  $D$  represents the standard diffusion coefficient,  $t$  denotes the scanning time,  $Q_{dl}$  and  $Q_{ads}$  are the double-layer charge and faradic charge.
